# Supplementary material for: Rhamnose Links Moonlighting Proteins to Membrane Phospholipid in Mycoplasmas
Source: PubMed Central journal article supplement (PMC5014317; doi:10.1371/journal.pone.0162505), 2016-09-07
Supplement: pone.0162505.s001.pdf [file pone.0162505.s001.pdf]

## S1 Figure

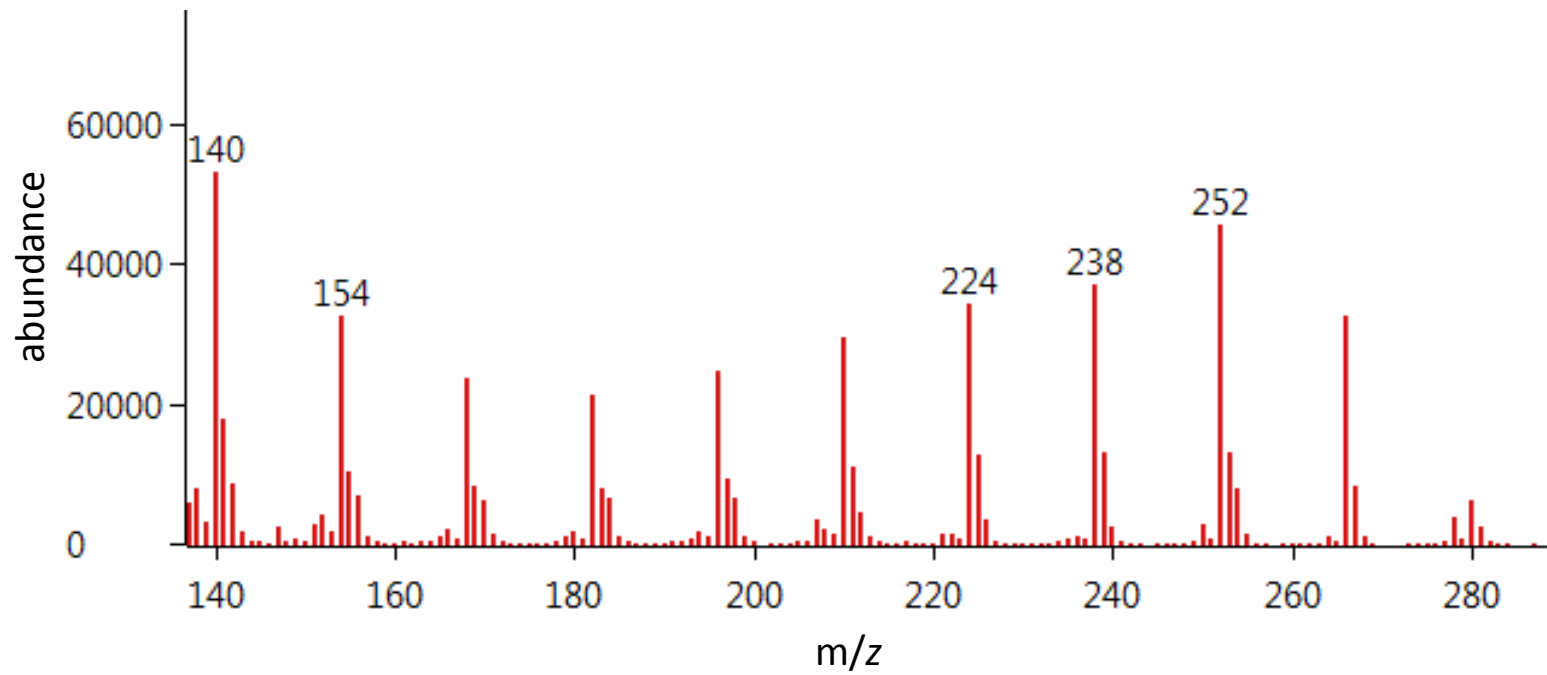

**S1 Fig.** MS spectrum from the peak labeled lipid in the GC/MS shown in Fig 2 panel B. This characteristic fragmentation pattern of 14 Da. increments is highly indicative of a long chain fatty acid.
