# Supplementary material for: Rhamnose Links Moonlighting Proteins to Membrane Phospholipid in Mycoplasmas
Source: PubMed Central journal article supplement (PMC5014317; doi:10.1371/journal.pone.0162505), 2016-09-07
Supplement: pone.0162505.s004.pdf [file pone.0162505.s004.pdf]

Table S1. MS/MS peak assignments for the peptide LLEIEDQLEEA AVFPGK from *M. pulmonis* membrane enolase.

| <i>m/z</i> | assignment                        | <i>m/z</i> | assignment                        |
|------------|-----------------------------------|------------|-----------------------------------|
| 2227.08    | b <sub>2</sub>                    | 283.08     | y <sub>3</sub> -H <sub>2</sub> O  |
| 338.17     | b <sub>3</sub> -H <sub>2</sub> O  | 301.17     | y <sub>3</sub>                    |
| 356.17     | b <sub>3</sub>                    | 430.25     | y <sub>4</sub> -H <sub>2</sub> O  |
| 469.33     | b <sub>4</sub>                    | 448.25     | y <sub>4</sub>                    |
| 598.34     | b <sub>5</sub>                    | 547.34     | y <sub>5</sub>                    |
| 713.34     | b <sub>6</sub>                    | 601.67     | y <sub>6</sub> -NH <sub>3</sub>   |
| 969.51     | b <sub>7</sub>                    | 618.34     | y <sub>6</sub>                    |
| 1082.57    | b <sub>8</sub>                    | 689.25     | y <sub>7</sub>                    |
| 1211.50    | b <sub>9</sub>                    | 818.34     | y <sub>8</sub>                    |
| 1323.34    | b <sub>10</sub> -NH <sub>3</sub>  | 947.34     | y <sub>9</sub>                    |
| 1340.84    | b <sub>10</sub>                   | 1060.46    | y <sub>10</sub>                   |
| 1393.50    | b <sub>11</sub> -H <sub>2</sub> O | 1298.48    | y <sub>11</sub> -H <sub>2</sub> O |
| 1411.50    | b <sub>11</sub>                   | 1431.67    | y <sub>12</sub>                   |
| 1482.67    | b <sub>12</sub>                   | 1542.63    | y <sub>13</sub> -H <sub>2</sub> O |
| 1581.67    | b <sub>13</sub>                   | 1560.67    | y <sub>13</sub>                   |
| 1710.50    | b <sub>14</sub> -H <sub>2</sub> O | 1656.17    | y <sub>14</sub> -H <sub>2</sub> O |
| 1728.83    | b <sub>14</sub>                   | 1673.83    | y <sub>14</sub>                   |
| 1825.67    | b <sub>15</sub>                   | 1784.80    | y <sub>15</sub> -H <sub>2</sub> O |
| 1882.84    | b <sub>16</sub>                   | 1802.84    | y <sub>15</sub>                   |
|            |                                   | 1915.84    | y <sub>16</sub>                   |
